# Supplementary material for: Three-Dimensional Electrical Resistivity Tomography for Sustainable Groundwater Mapping in Abéché Basin Chad
Source: Research Square preprint supplement (doi:10.21203/rs.3.rs-7665557/v1), 2025-10-15
Supplement: Supplementary file 1 [file ed2622bd13993e08504e94f4.docx]

Tableau S1: possible model of the anomalies

| N° | Forms of anomaly | Comment |
| --- | --- | --- |
| 1 | 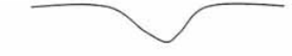 | Well marked and constricted fault. Precise hydrogeological node or single fault cut perpendicularly |
| 2 | 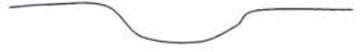 | Well-marked but wide fault. Wide hydrogeological node or single fault intersected not perpendicularly, hydrogeological node border |
| 3 | 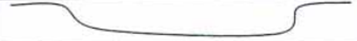 | Very wide or intersected fault with a small angle and/or faults intersected before the node |
| 4 | 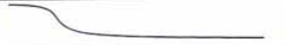 | Collapsed compartment? |
| 5 | 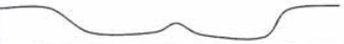 | Fault intersected before the node |
| 6 | 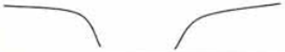 | Very marked fault |
| 7 |  | other anomalies |

Tableau S2: morphological model of the formations covering the anomaly

| N° | Shapes superimposed on the anomaly | Comments |
| --- | --- | --- |
| A | 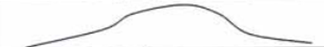 | Medium-strength partial area above the fault, temporary reservoir above the fractured fault? |
| B | 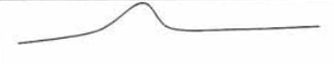 | Moderately resistant zone above the fault, temporary reservoir above the fractured fault? Possibility of a lateral dyke |
| C | 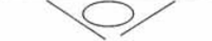 | Two inclined faults possibly individuating a ball alteration |
| D | 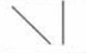 | Junction of two vertical and inclined faults |
| E | 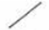 | Inclined fault |
| F |  | other anomalies |
